# Supplementary material
Source: Springer Nature journal article supplement (https://www.springermedizin.de/resource/supplementary/12889_2014_6596_MOESM1_ESM.pdf/9498668)
Supplement: MOESM1 [file 9498668]

Alumni who graduated between 1956 and 1991; n=3,918

Exclusion:

Died or no record of address; n=382

Alumni who were mailed follow-up questionnaire; n=3,536

Alumni who returned questionnaire; n=1,385

Exclusion:

Did not answer the questionnaire; n=37

**Alumni who graduated after 1971\* ; n=570**

Exclusion:  
Alumni who graduated before 1971\* ; n=778  
(No cardiorespiratory fitness data\*)

**Present study subjects**
